# Supplementary material for: Insertion free energy of PAP[5] water channels into block copolymer membranes
Source: Royal Society of Chemistry journal article supplement (doi:10.1039/d1me00129a), 2021-12-09
Supplement: d1me00129a1.pdf [file d1me00129a1.pdf]

# Insertion free energy of PAP[5] water channels into block copolymer membranes

## Supporting information

Ritwick Kali, Scott T. Milner

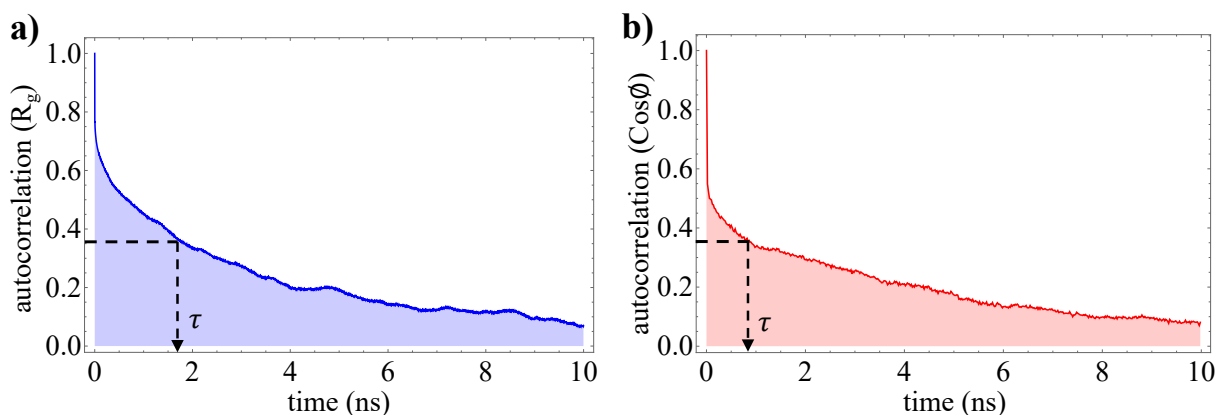

Figure SI 1: The autocorrelation function of a) radius of gyration ( $R_g$ ) of the hydrophobic PB blocks in PB16PEO9 membrane. b) Cosine of angular tilt of the pore collar ( $\text{Cos}(\Phi)$ ) with respect to the membrane normal in PB16PEO9 membrane. The time in which the autocorrelation functions decay to a value of  $e^{-1}$  gives a characteristic relaxation time  $\tau$ .

Autocorrelation function  $A(k)$  of a time series  $x_i = \{x_1, x_2, \dots, x_n\}$  is given as

$$A(k) = \frac{\sum_{i=1}^{n-k} (x_i - \bar{x})(x_{i+k} - \bar{x})}{\sum_{i=1}^n (x_i - \bar{x})^2} \quad (1)$$

where  $\bar{x}$  is the mean of the time series  $x_i$

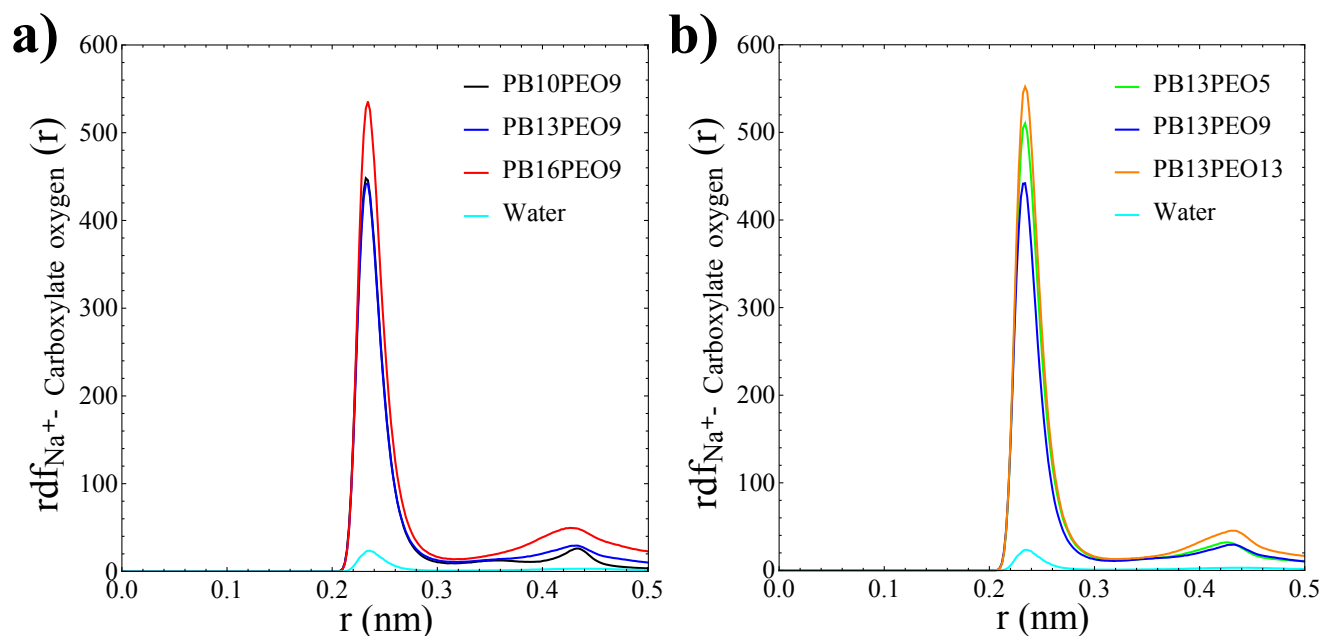

Figure SI 2: The radial distribution function of Na<sup>+</sup> and carboxylate oxygens for a) different PB block lengths and b) different PEO block lengths, plotted out to the second counterion shell boundary (0.5 nm).

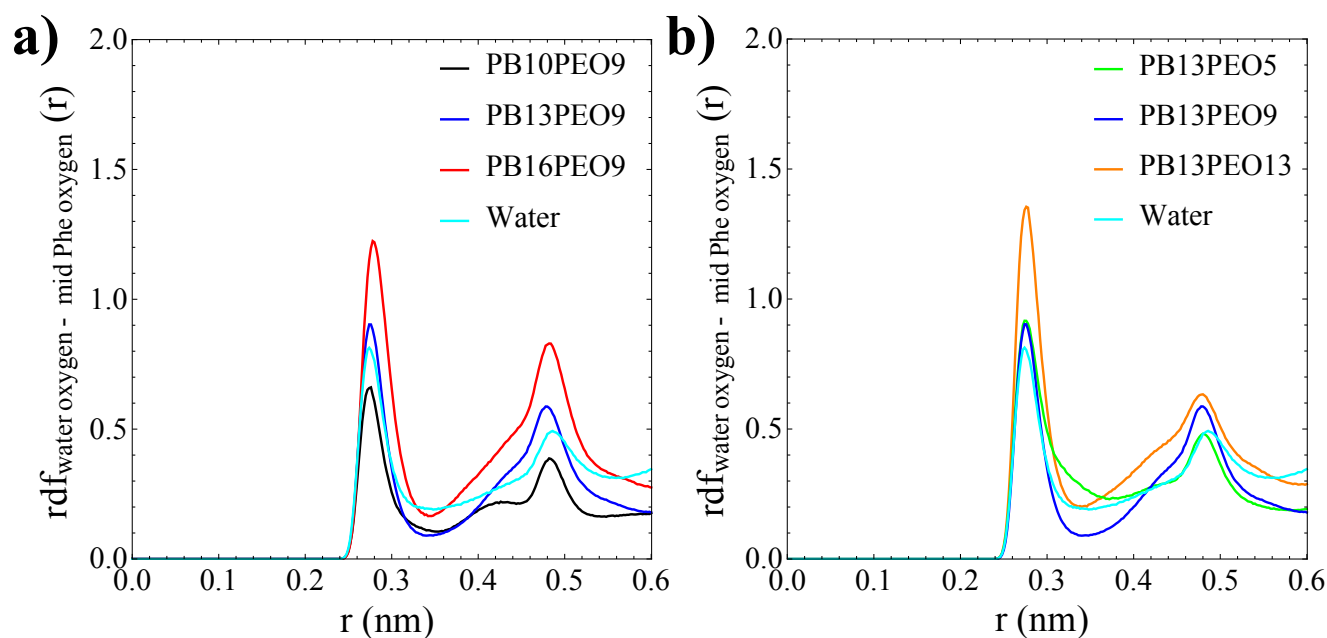

Figure SI 3: The radial distribution function of water oxygens and mid-phenylalanine carbonyl oxygen for a) different PB block lengths and b) different PEO block lengths, plotted out to the second hydration shell boundary (0.6 nm)
